# Supplementary material
Source: MDPI journal article supplement (https://www.mdpi.com/2077-0472/12/7/1031)
Supplement: s1 [file s1]

# Eco-Efficiency Analysis to Improve Environmental Performance of Wheat Production

**Table S1.** The farm input and output data (quantity per ha-annual) for DEA matrix for 169 wheat farms.

| DMU# | Input      |               |            |                         |                   |               |           |                                    |                       |          |           | Output                  |
|------|------------|---------------|------------|-------------------------|-------------------|---------------|-----------|------------------------------------|-----------------------|----------|-----------|-------------------------|
|      | Labour (h) | Machinery (h) | Diesel (L) | Water (m <sup>3</sup> ) | Electricity (kWh) | Biocides (kg) | Urea (kg) | P <sub>2</sub> O <sub>5</sub> (kg) | K <sub>2</sub> O (kg) | FYM* (t) | Seed (kg) | Wheat <sup>b</sup> (kg) |
| 1    | 101        | 36            | 206.8      | 4304                    | 160               | 3             | 100       | 100                                | 50                    | 0        | 220       | 3000                    |
| 2    | 83.5       | 39            | 170        | 2672                    | 240               | 5             | 50        | 100                                | 0                     | 10       | 200       | 4000                    |
| 3    | 104        | 46            | 195.1      | 4712                    | 153               | 3             | 100       | 150                                | 50                    | 0        | 200       | 5000                    |
| 4    | 85         | 50            | 199.1      | 2672                    | 100               | 5             | 100       | 100                                | 25                    | 0        | 190       | 3000                    |
| 5    | 76.5       | 45            | 178.9      | 4355                    | 232.4             | 4             | 150       | 150                                | 50                    | 0        | 200       | 4500                    |
| 6    | 125        | 49            | 198.9      | 3898                    | 250               | 4             | 150       | 100                                | 25                    | 10       | 210       | 4000                    |
| 7    | 109.5      | 41            | 179.3      | 4712                    | 150               | 5             | 150       | 150                                | 50                    | 5        | 200       | 4500                    |
| 8    | 82         | 43            | 177.6      | 2672                    | 206.4             | 4             | 100       | 100                                | 0                     | 0        | 220       | 5000                    |
| 9    | 54.5       | 43            | 165.2      | 2927                    | 300               | 5             | 150       | 150                                | 75                    | 0        | 200       | 4500                    |
| 10   | 150        | 30            | 183.5      | 4712                    | 365               | 4             | 200       | 100                                | 50                    | 10       | 220       | 3000                    |
| 11   | 83.5       | 39            | 170        | 2672                    | 190               | 5             | 150       | 50                                 | 75                    | 0        | 200       | 4000                    |
| 12   | 50.5       | 50            | 199.1      | 2672                    | 206.4             | 5             | 100       | 100                                | 0                     | 0        | 220       | 3000                    |
| 13   | 125        | 49            | 198.9      | 3898                    | 150               | 4             | 150       | 150                                | 50                    | 10       | 220       | 4000                    |
| 14   | 90         | 43            | 177.6      | 2672                    | 150               | 4             | 200       | 50                                 | 0                     | 0        | 200       | 5000                    |
| 15   | 201        | 36            | 206.8      | 4304                    | 200               | 3             | 100       | 100                                | 50                    | 0        | 220       | 3000                    |
| 16   | 104        | 46            | 195.1      | 4712                    | 240               | 3             | 200       | 150                                | 50                    | 0        | 210       | 5000                    |
| 17   | 76.5       | 45            | 178.9      | 4355                    | 150               | 4             | 150       | 100                                | 0                     | 0        | 200       | 4500                    |
| 18   | 109.5      | 41            | 179.3      | 4712                    | 323.6             | 5             | 100       | 50                                 | 50                    | 10       | 200       | 3000                    |
| 19   | 54.5       | 43            | 165.2      | 2927                    | 170               | 5             | 100       | 100                                | 100                   | 0        | 210       | 4500                    |
| 20   | 150        | 30            | 183.5      | 4712                    | 338.2             | 4             | 200       | 100                                | 75                    | 5        | 200       | 4000                    |
| 21   | 231        | 30            | 187.7      | 4400                    | 150               | 3.5           | 150       | 50                                 | 0                     | 12       | 220       | 4000                    |
| 22   | 166        | 27            | 169.5      | 4100                    | 241               | 5             | 0         | 100                                | 50                    | 20       | 200       | 3000                    |
| 23   | 170        | 28            | 181.5      | 4712                    | 150               | 2.5           | 200       | 150                                | 25                    | 0        | 200       | 5300                    |
| 24   | 144.5      | 17            | 137.6      | 3590                    | 280               | 3             | 150       | 50                                 | 50                    | 0        | 220       | 3500                    |
| 25   | 176.5      | 16            | 144        | 2264                    | 120               | 3             | 150       | 150                                | 75                    | 0        | 200       | 4000                    |
| 26   | 178.5      | 15            | 135.6      | 3080                    | 160               | 6             | 100       | 50                                 | 0                     | 0        | 200       | 5000                    |
| 27   | 156        | 16            | 143.2      | 3896                    | 310               | 3             | 200       | 50                                 | 0                     | 5        | 220       | 3500                    |
| 28   | 190.5      | 43            | 200.7      | 2120                    | 270               | 5             | 150       | 100                                | 50                    | 6        | 220       | 5000                    |
| 29   | 231        | 30            | 187.7      | 4400                    | 310               | 3.5           | 150       | 50                                 | 75                    | 12       | 210       | 4000                    |
| 30   | 170        | 28            | 181.5      | 4712                    | 206.4             | 2.5           | 200       | 50                                 | 50                    | 0        | 200       | 3000                    |
| 31   | 176.5      | 16            | 144        | 2264                    | 118.5             | 3             | 150       | 150                                | 0                     | 0        | 200       | 4000                    |
| 32   | 256        | 16            | 143.2      | 3896                    | 150               | 3             | 50        | 50                                 | 50                    | 20       | 220       | 3500                    |
| 33   | 266        | 27            | 169.5      | 4100                    | 260               | 5             | 75        | 100                                | 0                     | 0        | 200       | 3000                    |
| 34   | 144.5      | 17            | 137.6      | 3590                    | 150               | 3             | 150       | 50                                 | 50                    | 0        | 220       | 5500                    |
| 35   | 178.5      | 15            | 135.6      | 3080                    | 160               | 8             | 100       | 50                                 | 0                     | 0        | 200       | 3500                    |
| 36   | 119        | 43            | 200.7      | 2120                    | 170               | 5             | 150       | 100                                | 50                    | 6        | 220       | 5000                    |
| 37   | 185.5      | 12            | 139.2      | 3080                    | 210               | 1             | 100       | 50                                 | 0                     | 0        | 200       | 4000                    |
| 38   | 160        | 12            | 139.2      | 4712                    | 250.3             | 3             | 100       | 50                                 | 0                     | 0        | 230       | 3500                    |

|    |       |    |       |      |       |     |     |     |     |    |     |      |
|----|-------|----|-------|------|-------|-----|-----|-----|-----|----|-----|------|
| 39 | 182.5 | 14 | 141.2 | 2264 | 187   | 3   | 50  | 100 | 50  | 12 | 220 | 3000 |
| 40 | 185.5 | 12 | 139.2 | 3080 | 310   | 2   | 100 | 50  | 50  | 0  | 200 | 4000 |
| 41 | 130   | 12 | 139.2 | 4712 | 230   | 3   | 100 | 50  | 100 | 0  | 210 | 3500 |
| 42 | 182.5 | 14 | 141.2 | 2264 | 180   | 3   | 50  | 100 | 50  | 0  | 200 | 3000 |
| 43 | 163   | 19 | 150.5 | 2060 | 338.2 | 4   | 200 | 100 | 0   | 0  | 240 | 4000 |
| 44 | 144   | 12 | 139.2 | 6140 | 150   | 3   | 100 | 50  | 0   | 0  | 220 | 3500 |
| 45 | 237   | 16 | 147.5 | 2120 | 170   | 5   | 50  | 50  | 25  | 0  | 200 | 1500 |
| 46 | 79.5  | 50 | 208   | 2672 | 370   | 4   | 0   | 50  | 0   | 10 | 200 | 5000 |
| 47 | 190.5 | 17 | 137.6 | 2120 | 260   | 2.5 | 100 | 100 | 50  | 0  | 210 | 2000 |
| 48 | 159   | 19 | 150.5 | 2060 | 145   | 3   | 150 | 150 | 0   | 0  | 210 | 4000 |
| 49 | 137   | 16 | 147.5 | 2120 | 382.2 | 5   | 50  | 50  | 50  | 0  | 200 | 1500 |
| 50 | 180   | 17 | 137.6 | 2120 | 160   | 2.5 | 100 | 100 | 50  | 0  | 220 | 2000 |
| 51 | 143   | 12 | 139.2 | 6140 | 190   | 1   | 50  | 100 | 0   | 0  | 230 | 3500 |
| 52 | 79.5  | 50 | 208   | 2672 | 214   | 4   | 0   | 50  | 50  | 15 | 200 | 5000 |
| 53 | 237   | 16 | 147.5 | 2120 | 139   | 5   | 50  | 50  | 75  | 0  | 210 | 1500 |
| 54 | 167   | 17 | 137.6 | 2120 | 265   | 2.5 | 100 | 100 | 50  | 0  | 200 | 2000 |
| 55 | 70    | 24 | 142.7 | 2315 | 190   | 3   | 100 | 50  | 0   | 0  | 200 | 6000 |
| 56 | 89    | 29 | 152   | 2840 | 150   | 5   | 50  | 100 | 100 | 8  | 210 | 3500 |
| 57 | 67    | 25 | 139.3 | 2888 | 170   | 2.5 | 150 | 100 | 0   | 0  | 200 | 5350 |
| 58 | 80    | 32 | 151.5 | 3845 | 140   | 1   | 50  | 50  | 50  | 10 | 200 | 5000 |
| 59 | 158.5 | 21 | 150.5 | 2120 | 180   | 3.5 | 100 | 100 | 25  | 20 | 210 | 2500 |
| 60 | 165.5 | 15 | 137.5 | 2120 | 190   | 2.5 | 150 | 50  | 0   | 0  | 200 | 2000 |
| 61 | 171   | 20 | 149.5 | 2970 | 210   | 2   | 50  | 100 | 50  | 10 | 240 | 4000 |
| 62 | 194   | 31 | 193.2 | 2360 | 220   | 3   | 150 | 50  | 25  | 12 | 200 | 2150 |
| 63 | 153   | 17 | 140.9 | 4760 | 190   | 5   | 200 | 50  | 0   | 0  | 200 | 5000 |
| 64 | 188   | 15 | 142.2 | 2520 | 265   | 2.5 | 50  | 150 | 25  | 16 | 210 | 3200 |
| 65 | 116   | 20 | 155.9 | 5120 | 150   | 3   | 150 | 100 | 0   | 0  | 200 | 4000 |
| 66 | 150   | 13 | 135.8 | 2672 | 170   | 3   | 100 | 0   | 50  | 0  | 210 | 3000 |
| 67 | 185   | 28 | 155.4 | 2120 | 350   | 1.5 | 100 | 100 | 75  | 0  | 200 | 5000 |
| 68 | 195   | 12 | 139.2 | 3080 | 167.3 | 2   | 150 | 100 | 0   | 5  | 220 | 1600 |
| 69 | 89    | 24 | 142.7 | 2315 | 140   | 3   | 200 | 75  | 50  | 0  | 200 | 4000 |
| 70 | 64    | 25 | 139.3 | 2888 | 232.4 | 2.5 | 100 | 100 | 0   | 0  | 210 | 3600 |
| 71 | 158.5 | 21 | 150.5 | 2120 | 157   | 3.5 | 100 | 100 | 25  | 10 | 200 | 2500 |
| 72 | 171   | 20 | 149.5 | 2970 | 279   | 2   | 50  | 50  | 50  | 5  | 220 | 4000 |
| 73 | 189.5 | 17 | 140.9 | 4760 | 157   | 5   | 200 | 50  | 50  | 0  | 200 | 5500 |
| 74 | 116   | 20 | 155.9 | 5120 | 124   | 3   | 150 | 100 | 0   | 20 | 200 | 5000 |
| 75 | 185   | 28 | 155.4 | 2120 | 150   | 1.5 | 200 | 75  | 0   | 0  | 200 | 4500 |
| 76 | 66    | 29 | 152   | 2840 | 160   | 4   | 50  | 100 | 75  | 15 | 220 | 3500 |
| 77 | 85    | 32 | 151.5 | 3845 | 199   | 2   | 50  | 200 | 50  | 12 | 200 | 5000 |
| 78 | 165.5 | 15 | 137.5 | 2120 | 114   | 2.5 | 200 | 150 | 0   | 0  | 200 | 2000 |
| 79 | 120   | 31 | 193.2 | 2360 | 145   | 3   | 150 | 100 | 75  | 12 | 200 | 2100 |
| 80 | 179   | 15 | 142.2 | 2520 | 340   | 2.5 | 50  | 150 | 50  | 16 | 220 | 3000 |
| 81 | 186   | 13 | 135.8 | 2672 | 279   | 3   | 130 | 0   | 0   | 0  | 200 | 3100 |
| 82 | 165   | 12 | 139.2 | 3080 | 284   | 1   | 120 | 100 | 25  | 0  | 220 | 1600 |
| 83 | 110   | 28 | 181.5 | 2672 | 167   | 3   | 100 | 50  | 50  | 4  | 200 | 2500 |
| 84 | 87    | 43 | 195.7 | 3896 | 110   | 2   | 150 | 50  | 0   | 0  | 220 | 2000 |
| 85 | 155   | 30 | 187.7 | 3896 | 150   | 2   | 100 | 50  | 50  | 0  | 220 | 3500 |
| 86 | 125   | 36 | 206   | 3284 | 140   | 3   | 100 | 50  | 0   | 0  | 200 | 3000 |
| 87 | 175   | 22 | 166.5 | 2060 | 220   | 2.5 | 75  | 50  | 50  | 10 | 210 | 2500 |
| 88 | 119   | 34 | 200.5 | 3536 | 280   | 2.5 | 150 | 100 | 50  | 0  | 220 | 3000 |
| 89 | 170   | 32 | 202.8 | 4702 | 165   | 1   | 200 | 100 | 0   | 0  | 200 | 2500 |
| 90 | 140   | 32 | 198.5 | 4702 | 114   | 2.5 | 200 | 50  | 50  | 0  | 210 | 3500 |
| 91 | 77    | 48 | 207.3 | 5528 | 187   | 2   | 75  | 150 | 0   | 0  | 200 | 2500 |
| 92 | 60.5  | 52 | 204.2 | 4355 | 120   | 2   | 200 | 100 | 0   | 0  | 200 | 2000 |
| 93 | 87    | 55 | 230.7 | 2978 | 170   | 2.5 | 150 | 150 | 100 | 10 | 210 | 2500 |
| 94 | 166   | 34 | 204.8 | 4702 | 190   | 2   | 200 | 150 | 50  | 0  | 200 | 2500 |
| 95 | 174   | 32 | 202.8 | 3998 | 140   | 1   | 120 | 100 | 50  | 0  | 220 | 2000 |
| 96 | 138   | 34 | 204.8 | 4702 | 110   | 2.5 | 150 | 100 | 0   | 0  | 210 | 2500 |
| 97 | 90    | 44 | 194.5 | 3896 | 300   | 1   | 150 | 50  | 50  | 0  | 210 | 2500 |

|     |       |    |       |      |     |     |     |     |    |    |     |      |
|-----|-------|----|-------|------|-----|-----|-----|-----|----|----|-----|------|
| 98  | 183   | 28 | 181.5 | 2672 | 200 | 3   | 110 | 50  | 25 | 0  | 200 | 3000 |
| 99  | 130   | 30 | 187.7 | 3896 | 210 | 2   | 100 | 50  | 50 | 15 | 220 | 3500 |
| 100 | 140   | 22 | 166.5 | 2060 | 300 | 2.5 | 100 | 50  | 0  | 0  | 200 | 2500 |
| 101 | 180   | 32 | 202.8 | 4702 | 150 | 1   | 200 | 100 | 0  | 0  | 220 | 2000 |
| 102 | 77    | 48 | 207.3 | 5528 | 150 | 3   | 150 | 150 | 50 | 0  | 210 | 2500 |
| 103 | 87    | 55 | 230.7 | 2978 | 300 | 2.5 | 150 | 150 | 25 | 0  | 200 | 3000 |
| 104 | 174   | 32 | 202.8 | 3998 | 250 | 1   | 200 | 100 | 0  | 0  | 200 | 2500 |
| 105 | 100   | 44 | 194.5 | 3896 | 240 | 1   | 150 | 50  | 50 | 0  | 200 | 2000 |
| 106 | 120   | 43 | 195.7 | 3896 | 300 | 2   | 150 | 50  | 50 | 20 | 220 | 2000 |
| 107 | 134   | 36 | 206   | 3284 | 180 | 3   | 130 | 50  | 50 | 0  | 200 | 3000 |
| 108 | 191   | 34 | 200.5 | 3536 | 200 | 2.5 | 150 | 100 | 0  | 0  | 200 | 3000 |
| 109 | 160   | 32 | 198.5 | 4702 | 290 | 2.5 | 100 | 50  | 50 | 5  | 210 | 3500 |
| 110 | 75    | 52 | 204.2 | 4355 | 120 | 2   | 120 | 100 | 75 | 0  | 220 | 2500 |
| 111 | 173   | 34 | 204.8 | 4702 | 240 | 2   | 75  | 150 | 50 | 0  | 200 | 2000 |
| 112 | 115   | 34 | 204.8 | 4702 | 350 | 2.5 | 75  | 100 | 25 | 0  | 200 | 2500 |
| 113 | 120   | 14 | 145.5 | 6590 | 210 | 1   | 100 | 0   | 0  | 20 | 240 | 5000 |
| 114 | 181   | 18 | 149.5 | 2060 | 390 | 2   | 100 | 50  | 50 | 0  | 200 | 3500 |
| 115 | 145   | 14 | 141   | 5120 | 290 | 2   | 140 | 100 | 50 | 10 | 220 | 5300 |
| 116 | 180   | 18 | 149.5 | 2570 | 105 | 3   | 100 | 0   | 0  | 0  | 200 | 4000 |
| 117 | 150   | 18 | 149.5 | 2570 | 300 | 2   | 100 | 50  | 25 | 0  | 210 | 3500 |
| 118 | 165   | 17 | 148.5 | 2570 | 180 | 3   | 150 | 0   | 0  | 15 | 200 | 4000 |
| 119 | 170   | 17 | 148.5 | 3080 | 130 | 3   | 200 | 0   | 0  | 0  | 220 | 3000 |
| 120 | 162   | 26 | 161   | 3080 | 160 | 7   | 200 | 50  | 0  | 15 | 200 | 6000 |
| 121 | 100   | 21 | 161   | 3590 | 165 | 3   | 150 | 50  | 50 | 0  | 200 | 6500 |
| 122 | 142   | 19 | 154   | 3080 | 140 | 3.5 | 200 | 0   | 0  | 0  | 220 | 5000 |
| 123 | 128   | 14 | 145.5 | 6590 | 275 | 2   | 100 | 50  | 50 | 20 | 240 | 4000 |
| 124 | 116   | 14 | 141   | 5120 | 330 | 3   | 150 | 100 | 75 | 0  | 220 | 5300 |
| 125 | 140   | 18 | 149.5 | 2570 | 177 | 2   | 100 | 0   | 0  | 0  | 210 | 4000 |
| 126 | 109   | 17 | 148.5 | 3080 | 140 | 3   | 200 | 0   | 25 | 0  | 200 | 6000 |
| 127 | 103   | 21 | 161   | 3590 | 267 | 3   | 150 | 50  | 0  | 0  | 220 | 5500 |
| 128 | 181   | 18 | 149.5 | 2060 | 192 | 2   | 100 | 50  | 50 | 0  | 200 | 3500 |
| 129 | 108   | 18 | 149.5 | 2570 | 130 | 3   | 100 | 0   | 0  | 20 | 210 | 4500 |
| 130 | 181   | 17 | 148.5 | 2570 | 300 | 3   | 150 | 50  | 25 | 0  | 220 | 3500 |
| 131 | 155   | 26 | 161   | 3080 | 270 | 7   | 200 | 50  | 0  | 0  | 200 | 5000 |
| 132 | 170   | 19 | 154   | 3080 | 300 | 3   | 200 | 0   | 50 | 20 | 200 | 4000 |
| 133 | 67    | 39 | 172   | 2070 | 359 | 5.5 | 150 | 100 | 75 | 0  | 210 | 5500 |
| 134 | 160   | 26 | 174   | 3990 | 240 | 4   | 140 | 150 | 0  | 0  | 200 | 3500 |
| 135 | 116   | 26 | 170.4 | 2672 | 110 | 4.5 | 200 | 100 | 25 | 15 | 200 | 3000 |
| 136 | 84    | 40 | 170   | 3998 | 200 | 4   | 150 | 50  | 50 | 0  | 220 | 6000 |
| 137 | 71    | 42 | 179   | 2672 | 320 | 5   | 200 | 100 | 0  | 0  | 200 | 4000 |
| 138 | 76.5  | 38 | 169.2 | 3998 | 140 | 2.5 | 175 | 150 | 25 | 10 | 220 | 5000 |
| 139 | 90    | 39 | 172   | 2070 | 155 | 5.5 | 150 | 100 | 50 | 0  | 210 | 3500 |
| 140 | 106   | 26 | 170   | 2672 | 120 | 4.5 | 200 | 100 | 25 | 5  | 200 | 5000 |
| 141 | 71    | 42 | 179.1 | 2672 | 240 | 5   | 200 | 50  | 0  | 0  | 200 | 4000 |
| 142 | 112   | 26 | 174   | 3990 | 320 | 4   | 175 | 150 | 25 | 0  | 200 | 5500 |
| 143 | 75    | 40 | 170.5 | 3998 | 150 | 4   | 120 | 100 | 0  | 0  | 220 | 6000 |
| 144 | 76.5  | 38 | 169   | 3998 | 200 | 2.5 | 100 | 50  | 50 | 20 | 200 | 3000 |
| 145 | 142   | 22 | 164.5 | 3080 | 137 | 2   | 200 | 150 | 25 | 0  | 220 | 4000 |
| 146 | 115.5 | 40 | 182   | 5120 | 190 | 3   | 150 | 100 | 0  | 0  | 210 | 3500 |
| 147 | 113   | 22 | 164.5 | 3080 | 289 | 2   | 200 | 150 | 50 | 0  | 220 | 4000 |
| 148 | 120   | 40 | 182   | 5120 | 220 | 4   | 150 | 50  | 0  | 0  | 210 | 5000 |
| 149 | 136   | 22 | 164.5 | 3080 | 130 | 2   | 200 | 150 | 75 | 10 | 220 | 2000 |
| 150 | 115.5 | 40 | 182   | 5120 | 120 | 2   | 120 | 50  | 50 | 0  | 210 | 4000 |
| 151 | 124.5 | 24 | 168.5 | 2000 | 198 | 3   | 100 | 50  | 0  | 5  | 200 | 2000 |
| 152 | 60.5  | 42 | 178   | 6392 | 345 | 4   | 150 | 50  | 0  | 0  | 210 | 3600 |
| 153 | 124.5 | 24 | 168.5 | 2000 | 244 | 3   | 100 | 100 | 50 | 0  | 200 | 2000 |
| 154 | 60.5  | 42 | 178.1 | 6392 | 130 | 3   | 150 | 50  | 0  | 10 | 220 | 4000 |
| 155 | 124.5 | 24 | 168.5 | 2000 | 135 | 4   | 100 | 50  | 50 | 0  | 210 | 2000 |
| 156 | 60.5  | 42 | 178   | 6392 | 240 | 3   | 120 | 100 | 0  | 0  | 220 | 3500 |

|      |       |      |       |        |       |     |       |      |      |     |       |      |
|------|-------|------|-------|--------|-------|-----|-------|------|------|-----|-------|------|
| 157  | 120   | 24   | 159   | 2672   | 140   | 4   | 0     | 50   | 50   | 15  | 240   | 5000 |
| 158  | 83    | 36   | 163.2 | 4100   | 200   | 3   | 150   | 100  | 0    | 0   | 210   | 3000 |
| 159  | 118   | 26   | 166   | 2264   | 209   | 4   | 50    | 50   | 25   | 14  | 220   | 4500 |
| 160  | 140   | 24   | 159   | 2672   | 250   | 4   | 50    | 50   | 50   | 20  | 240   | 5000 |
| 161  | 69    | 36   | 164.7 | 4100   | 248   | 3   | 150   | 100  | 0    | 0   | 200   | 4000 |
| 162  | 118   | 26   | 166.2 | 2264   | 130   | 4   | 50    | 50   | 50   | 12  | 240   | 6000 |
| 163  | 122   | 24   | 159   | 2672   | 110   | 4   | 75    | 0    | 50   | 10  | 220   | 3000 |
| 164  | 69    | 36   | 164.5 | 4100   | 330   | 3   | 120   | 100  | 0    | 5   | 200   | 3500 |
| 165  | 84    | 26   | 166   | 2264   | 220   | 4   | 100   | 50   | 50   | 0   | 240   | 4000 |
| 166  | 62.5  | 54   | 184   | 4650   | 210   | 2   | 50    | 0    | 50   | 15  | 200   | 2500 |
| 167  | 73    | 38   | 168.2 | 4700   | 160   | 3   | 75    | 0    | 25   | 0   | 220   | 3000 |
| 168  | 80    | 54   | 186.5 | 4800   | 350   | 2   | 50    | 50   | 0    | 10  | 210   | 2000 |
| 169  | 62.5  | 54   | 184   | 4700   | 190   | 3   | 100   | 50   | 50   | 0   | 220   | 2500 |
| Mean | 131.7 | 29.0 | 168.6 | 3494.7 | 208.9 | 3.2 | 125.8 | 79.3 | 31.2 | 4.2 | 209.6 | 3637 |

<sup>a</sup> FYM: Farmyard manure.

<sup>b</sup> It refers to clean wheat grains with 87% dry matter. The average of wheat grains is 3637 kg ha<sup>-1</sup>, with the crop residues of 2519 kg ha<sup>-1</sup> (both above and below ground residues) where 86% of the total biomass is harvested.

**Table S2.** Technical efficiency (TE) and operational reduction (%) of inputs for the inefficient wheat fields.

| DMU# | TE   | Operational reduction (%) |           |        |       |             |          |      |                               |                  |      |      |
|------|------|---------------------------|-----------|--------|-------|-------------|----------|------|-------------------------------|------------------|------|------|
|      |      | Labour                    | Machinery | Diesel | Water | Electricity | Biocides | Urea | P <sub>2</sub> O <sub>5</sub> | K <sub>2</sub> O | FYM  | Seed |
| 1    | 0.55 | 18.3                      | 15.2      | 18.0   | 20.9  | 0.0         | 0.0      | 0.0  | 22.4                          | 50.7             | 0    | 17.9 |
| 2    | 0.81 | 16.8                      | 15.3      | 8.1    | 14.1  | 0.0         | 31.2     | 0.0  | 44.7                          | 0.0              | 4.9  | 17.4 |
| 3    | 0.93 | 33.5                      | 39.6      | 27.5   | 39.0  | 0.0         | 0.0      | 0.0  | 55.1                          | 84.7             | 0    | 14.6 |
| 4    | 0.73 | 22.6                      | 41.0      | 32.4   | 4.2   | 0.0         | 36.6     | 0.0  | 40.0                          | 56.7             | 0    | 32.7 |
| 5    | 0.74 | 0.0                       | 35.4      | 13.3   | 29.8  | 15.2        | 18.5     | 19.2 | 49.1                          | 57.7             | 0    | 0.0  |
| 6    | 0.61 | 15.9                      | 31.4      | 12.0   | 12.5  | 15.7        | 10.3     | 6.4  | 29.0                          | 0.0              | 5.72 | 0.0  |
| 7    | 0.73 | 4.7                       | 37.6      | 10.2   | 23.3  | 0.0         | 28.6     | 0.0  | 56.5                          | 12.4             | 2.67 | 0.0  |
| 8    | 0.83 | 4.3                       | 36.6      | 14.0   | 0.0   | 3.8         | 21.5     | 0.0  | 37.0                          | 0.0              | 0    | 8.9  |
| 9    | 0.96 | 0.0                       | 54.5      | 31.5   | 37.0  | 48.8        | 51.4     | 46.3 | 71.3                          | 96.3             | 0    | 42.7 |
| 10   | 0.42 | 11.3                      | 9.2       | 1.8    | 7.8   | 21.1        | 6.0      | 7.8  | 19.0                          | 0.0              | 4.03 | 0.0  |
| 11   | 0.65 | 4.0                       | 26.5      | 8.5    | 0.0   | 2.4         | 26.0     | 15.6 | 0.0                           | 53.0             | 0    | 0.0  |
| 12   | 0.69 | 0.0                       | 45.3      | 33.5   | 26.0  | 23.3        | 39.4     | 19.3 | 44.3                          | 0.0              | 0    | 52.5 |
| 13   | 0.63 | 5.7                       | 35.1      | 11.2   | 12.6  | 0.0         | 9.0      | 0.0  | 50.5                          | 11.9             | 4.06 | 0.0  |
| 14   | 0.96 | 0.6                       | 38.9      | 19.0   | 0.0   | 0.0         | 22.0     | 48.4 | 0.0                           | 0.0              | 0    | 6.9  |
| 15   | 0.50 | 29.5                      | 16.5      | 13.7   | 16.9  | 0.0         | 1.0      | 0.0  | 20.9                          | 49.6             | 0    | 3.1  |
| 16   | 0.76 | 0.0                       | 38.0      | 11.6   | 18.1  | 18.1        | 0.0      | 17.1 | 44.3                          | 6.1              | 0    | 0.0  |
| 17   | 0.80 | 8.3                       | 21.1      | 12.3   | 19.5  | 0.0         | 10.5     | 23.2 | 15.7                          | 0.0              | 0    | 0.0  |
| 18   | 0.50 | 9.4                       | 14.1      | 2.5    | 17.0  | 18.2        | 17.2     | 0.0  | 0.0                           | 16.4             | 3.32 | 0.0  |
| 19   | 0.96 | 0.0                       | 54.5      | 31.5   | 37.0  | 12.5        | 51.4     | 21.3 | 58.8                          | 96.3             | 0    | 52.3 |
| 20   | 0.62 | 20.5                      | 18.5      | 7.5    | 14.7  | 31.5        | 15.5     | 15.4 | 30.8                          | 20.5             | 3.08 | 0.0  |
| 21   | 0.73 | 34.3                      | 11.9      | 9.8    | 13.0  | 0.0         | 0.0      | 0.0  | 0.0                           | 0.0              | 5.73 | 0.0  |
| 22   | 0.69 | 29.3                      | 0.0       | 7.9    | 29.7  | 23.7        | 20.8     | 0.0  | 38.8                          | 17.0             | 5.17 | 0.0  |
| 23   | 0.94 | 22.6                      | 21.5      | 14.6   | 35.9  | 0.0         | 0.0      | 8.5  | 69.1                          | 0.0              | 0    | 1.7  |
| 24   | 0.63 | 22.9                      | 0.0       | 0.0    | 9.5   | 31.0        | 7.3      | 0.0  | 27.1                          | 17.2             | 0    | 26.8 |
| 25   | 0.85 | 47.5                      | 6.6       | 16.8   | 0.0   | 0.0         | 18.3     | 7.4  | 79.2                          | 68.4             | 0    | 36.5 |
| 27   | 0.70 | 3.3                       | 0.0       | 0.0    | 0.4   | 25.9        | 0.0      | 34.0 | 15.9                          | 0.0              | 0    | 4.1  |
| 28   | 0.89 | 46.9                      | 28.9      | 18.7   | 0.0   | 20.1        | 14.0     | 36.9 | 31.4                          | 0.0              | 0    | 3.8  |
| 29   | 0.60 | 33.1                      | 13.1      | 5.8    | 10.5  | 25.2        | 5.1      | 0.0  | 0.0                           | 22.1             | 6.81 | 0.0  |
| 30   | 0.51 | 14.6                      | 16.9      | 7.3    | 13.5  | 7.5         | 0.0      | 16.0 | 0.0                           | 12.8             | 0    | 0.0  |
| 31   | 0.98 | 41.4                      | 0.0       | 16.3   | 0.0   | 0.0         | 11.3     | 11.4 | 91.3                          | 0.0              | 0    | 29.7 |
| 32   | 0.81 | 45.2                      | 0.0       | 7.3    | 1.8   | 0.0         | 9.3      | 0.0  | 40.0                          | 50.8             | 5.75 | 13.5 |
| 33   | 0.64 | 41.3                      | 21.3      | 13.7   | 7.0   | 19.9        | 37.6     | 0.0  | 21.5                          | 0.0              | 0    | 0.0  |

|     |      |      |      |      |      |      |      |      |      |      |      |      |
|-----|------|------|------|------|------|------|------|------|------|------|------|------|
| 34  | 0.99 | 36.0 | 0.0  | 0.0  | 15.0 | 5.1  | 11.3 | 0.0  | 42.6 | 27.0 | 0    | 42.0 |
| 35  | 0.70 | 0.0  | 0.0  | 0.0  | 0.0  | 0.0  | 17.5 | 0.0  | 0.0  | 0.0  | 0    | 0.0  |
| 36  | 0.90 | 22.3 | 36.6 | 22.9 | 0.0  | 0.0  | 24.4 | 44.6 | 41.8 | 27.8 | 0    | 9.6  |
| 38  | 0.88 | 0.0  | 0.0  | 11.1 | 37.2 | 30.1 | 0.0  | 10.1 | 10.1 | 0.0  | 0    | 46.7 |
| 39  | 0.79 | 36.6 | 0.0  | 19.9 | 0.0  | 33.8 | 0.0  | 0.0  | 55.8 | 52.5 | 4.51 | 49.6 |
| 40  | 0.98 | 11.3 | 0.0  | 6.7  | 0.8  | 36.0 | 0.0  | 0.0  | 0.0  | 84.3 | 0    | 11.3 |
| 41  | 0.85 | 0.0  | 0.0  | 13.9 | 30.7 | 19.0 | 0.0  | 0.0  | 0.0  | 68.7 | 0    | 33.7 |
| 42  | 0.96 | 65.3 | 13.8 | 37.4 | 0.0  | 34.2 | 51.7 | 0.0  | 56.3 | 96.4 | 0    | 68.6 |
| 43  | 0.81 | 44.3 | 0.0  | 16.8 | 0.0  | 43.7 | 21.3 | 47.0 | 47.0 | 0.0  | 0    | 57.9 |
| 44  | 0.91 | 0.0  | 0.0  | 15.8 | 53.6 | 0.0  | 0.0  | 10.5 | 20.5 | 0.0  | 0    | 48.3 |
| 45  | 0.48 | 37.0 | 12.1 | 20.7 | 0.0  | 16.1 | 34.8 | 0.0  | 10.2 | 48.4 | 0    | 36.3 |
| 47  | 0.42 | 26.8 | 0.0  | 7.0  | 0.0  | 20.0 | 0.0  | 0.0  | 29.0 | 34.2 | 0    | 22.3 |
| 48  | 0.85 | 42.5 | 0.0  | 16.0 | 0.0  | 0.0  | 12.0 | 31.2 | 67.2 | 0.0  | 0    | 33.4 |
| 49  | 0.48 | 28.7 | 12.1 | 20.7 | 0.0  | 34.1 | 34.8 | 0.0  | 10.2 | 48.4 | 0    | 36.3 |
| 50  | 0.42 | 25.9 | 0.0  | 7.0  | 0.0  | 6.0  | 0.0  | 0.0  | 29.0 | 34.2 | 0    | 26.6 |
| 53  | 0.48 | 37.0 | 12.1 | 20.7 | 0.0  | 8.9  | 34.8 | 0.0  | 10.2 | 48.4 | 0    | 41.1 |
| 54  | 0.42 | 24.7 | 0.0  | 7.0  | 0.0  | 20.4 | 0.0  | 0.0  | 29.0 | 34.2 | 0    | 18.1 |
| 56  | 0.66 | 0.0  | 6.6  | 0.8  | 15.0 | 0.0  | 21.6 | 0.0  | 35.7 | 46.0 | 0    | 4.4  |
| 59  | 0.47 | 27.5 | 0.0  | 7.0  | 0.0  | 3.5  | 10.9 | 1.9  | 27.3 | 43.6 | 9.32 | 14.5 |
| 60  | 0.48 | 19.7 | 0.0  | 9.3  | 0.0  | 10.3 | 0.0  | 22.7 | 10.0 | 0.0  | 0    | 20.0 |
| 61  | 0.90 | 39.6 | 0.0  | 11.9 | 0.0  | 34.6 | 0.0  | 0.0  | 59.4 | 35.6 | 0    | 46.6 |
| 62  | 0.36 | 22.6 | 8.2  | 9.2  | 0.0  | 5.0  | 0.0  | 11.5 | 0.0  | 33.2 | 4.29 | 0.0  |
| 63  | 0.96 | 0.1  | 0.0  | 2.3  | 37.8 | 10.2 | 0.0  | 48.2 | 0.0  | 0.0  | 0    | 0.0  |
| 64  | 0.81 | 41.7 | 0.0  | 17.8 | 0.0  | 47.0 | 0.0  | 0.0  | 66.7 | 14.1 | 5.86 | 35.3 |
| 65  | 0.80 | 12.6 | 0.0  | 9.9  | 40.5 | 0.0  | 0.0  | 6.2  | 60.7 | 0.0  | 0    | 5.7  |
| 66  | 0.86 | 26.8 | 0.0  | 16.5 | 20.8 | 32.8 | 30.3 | 0.0  | 0.0  | 75.0 | 0    | 51.8 |
| 68  | 0.41 | 11.9 | 0.0  | 6.0  | 0.0  | 0.0  | 0.0  | 17.7 | 26.6 | 0.0  | 0.85 | 18.0 |
| 69  | 0.78 | 10.5 | 21.5 | 10.0 | 0.0  | 0.0  | 11.3 | 27.5 | 56.7 | 60.8 | 0    | 22.9 |
| 70  | 0.70 | 0.0  | 10.3 | 6.4  | 13.8 | 20.4 | 0.0  | 0.0  | 29.3 | 0.0  | 0    | 21.3 |
| 71  | 0.47 | 25.6 | 0.0  | 6.2  | 0.0  | 0.0  | 9.4  | 4.1  | 28.0 | 30.7 | 3.96 | 7.9  |
| 72  | 0.92 | 44.5 | 0.0  | 13.5 | 0.0  | 44.1 | 0.0  | 0.0  | 0.0  | 56.0 | 0    | 32.3 |
| 73  | 0.96 | 45.7 | 0.0  | 0.0  | 38.6 | 10.9 | 41.2 | 10.0 | 85.2 | 55.8 | 0    | 9.0  |
| 76  | 0.74 | 0.0  | 0.0  | 4.6  | 12.5 | 0.0  | 27.0 | 0.0  | 41.9 | 50.9 | 6.63 | 34.1 |
| 77  | 0.98 | 2.1  | 6.3  | 0.0  | 18.4 | 25.1 | 0.0  | 0.0  | 74.3 | 17.7 | 2.84 | 0.0  |
| 78  | 0.51 | 23.2 | 0.0  | 9.8  | 0.0  | 0.0  | 0.0  | 18.9 | 47.7 | 0.0  | 0    | 21.4 |
| 79  | 0.38 | 6.5  | 11.5 | 9.7  | 0.0  | 0.0  | 0.0  | 8.9  | 24.5 | 27.2 | 3.24 | 0.0  |
| 80  | 0.76 | 37.3 | 0.0  | 16.7 | 0.0  | 51.0 | 0.0  | 0.0  | 62.6 | 44.5 | 5.49 | 40.7 |
| 81  | 0.92 | 43.7 | 0.0  | 20.5 | 20.4 | 59.5 | 21.7 | 0.0  | 0.0  | 0.0  | 0    | 45.5 |
| 82  | 0.43 | 0.0  | 0.0  | 3.3  | 3.9  | 13.4 | 0.0  | 9.1  | 21.5 | 39.6 | 0    | 15.4 |
| 83  | 0.42 | 9.9  | 6.7  | 7.6  | 0.0  | 0.0  | 0.0  | 0.0  | 1.2  | 21.5 | 0.65 | 0.0  |
| 84  | 0.53 | 0.0  | 26.7 | 22.9 | 25.7 | 0.0  | 0.0  | 17.6 | 0.0  | 0.0  | 0    | 38.8 |
| 85  | 0.75 | 28.1 | 35.8 | 23.8 | 12.6 | 0.0  | 0.0  | 0.0  | 0.0  | 39.2 | 0    | 35.1 |
| 86  | 0.60 | 15.0 | 17.6 | 19.3 | 11.1 | 0.0  | 0.0  | 0.0  | 0.0  | 0.0  | 0    | 7.0  |
| 87  | 0.50 | 26.5 | 0.0  | 11.1 | 0.0  | 11.7 | 0.0  | 0.0  | 1.4  | 30.3 | 3.65 | 14.8 |
| 88  | 0.50 | 0.0  | 9.4  | 9.6  | 7.0  | 6.2  | 0.0  | 0.8  | 0.0  | 15.6 | 0    | 0.5  |
| 89  | 0.70 | 4.1  | 37.6 | 26.8 | 34.1 | 0.0  | 0.0  | 30.1 | 34.8 | 0.0  | 0    | 19.0 |
| 90  | 0.72 | 26.2 | 40.7 | 28.0 | 33.4 | 0.0  | 1.6  | 13.3 | 71.6 | 42.5 | 0    | 33.8 |
| 91  | 0.57 | 0.0  | 36.4 | 24.2 | 26.6 | 8.5  | 0.0  | 0.0  | 35.0 | 0.0  | 0    | 13.6 |
| 92  | 0.50 | 0.0  | 30.0 | 23.5 | 24.5 | 0.0  | 0.0  | 22.8 | 14.4 | 0.0  | 0    | 25.1 |
| 93  | 0.43 | 0.0  | 22.8 | 14.6 | 0.0  | 0.0  | 0.0  | 10.1 | 30.9 | 34.3 | 3.08 | 1.5  |
| 94  | 0.48 | 6.6  | 24.2 | 12.7 | 14.0 | 0.0  | 0.0  | 17.9 | 31.4 | 22.8 | 0    | 0.0  |
| 95  | 0.60 | 9.9  | 29.7 | 25.5 | 29.4 | 0.0  | 0.0  | 0.0  | 30.0 | 59.3 | 0    | 37.5 |
| 96  | 0.60 | 28.0 | 12.0 | 24.4 | 26.9 | 0.0  | 0.0  | 19.4 | 18.7 | 0.0  | 0    | 31.5 |
| 97  | 0.86 | 0.0  | 57.5 | 48.2 | 56.6 | 37.6 | 0.0  | 50.9 | 0.0  | 22.9 | 0    | 86.2 |
| 98  | 0.49 | 28.8 | 8.1  | 9.5  | 1.9  | 3.7  | 0.0  | 0.0  | 0.0  | 29.5 | 0    | 0.0  |
| 99  | 0.58 | 15.2 | 0.0  | 6.3  | 0.0  | 11.8 | 0.0  | 0.0  | 0.0  | 4.4  | 4.99 | 0.0  |
| 100 | 0.48 | 22.0 | 0.6  | 10.9 | 0.0  | 21.5 | 0.0  | 0.0  | 2.5  | 0.0  | 0    | 10.2 |
| 101 | 0.58 | 9.1  | 29.6 | 23.7 | 31.2 | 0.0  | 0.0  | 23.7 | 29.0 | 0.0  | 0    | 32.6 |
| 102 | 0.44 | 0.0  | 21.2 | 13.5 | 19.5 | 0.0  | 0.0  | 9.9  | 26.8 | 26.2 | 0    | 10.4 |

|             |             |              |              |              |              |              |             |              |              |              |             |             |
|-------------|-------------|--------------|--------------|--------------|--------------|--------------|-------------|--------------|--------------|--------------|-------------|-------------|
| 103         | 0.54        | 0.0          | 29.9         | 19.9         | 0.4          | 20.1         | 0.0         | 2.0          | 21.9         | 12.9         | 0           | 0.0         |
| 104         | 0.65        | 0.0          | 40.7         | 22.2         | 17.1         | 13.0         | 0.0         | 33.3         | 32.8         | 0.0          | 0           | 5.6         |
| 105         | 0.66        | 0.0          | 44.3         | 35.3         | 41.3         | 17.5         | 0.0         | 38.0         | 0.0          | 18.4         | 0           | 54.6        |
| 106         | 0.33        | 7.2          | 9.8          | 4.8          | 0.0          | 14.7         | 0.0         | 11.3         | 0.0          | 2.7          | 4.46        | 0.0         |
| 107         | 0.48        | 16.3         | 18.3         | 12.1         | 3.0          | 1.3          | 0.0         | 0.0          | 0.0          | 19.0         | 0           | 0.0         |
| 108         | 0.55        | 25.0         | 17.4         | 15.3         | 17.8         | 3.8          | 0.0         | 12.2         | 25.0         | 0.0          | 0           | 0.0         |
| 109         | 0.58        | 28.1         | 8.9          | 12.6         | 19.4         | 22.5         | 0.0         | 0.0          | 0.0          | 30.4         | 1.01        | 0.0         |
| 110         | 0.56        | 0.0          | 40.6         | 25.3         | 24.0         | 0.0          | 0.0         | 7.7          | 35.5         | 33.0         | 0           | 43.9        |
| 111         | 0.43        | 18.5         | 20.0         | 14.9         | 9.7          | 9.8          | 0.0         | 0.0          | 23.4         | 40.5         | 0           | 0.0         |
| 112         | 0.53        | 9.7          | 25.1         | 18.6         | 11.9         | 26.0         | 9.6         | 0.0          | 17.9         | 53.3         | 0           | 0.0         |
| 114         | 0.77        | 36.5         | 0.0          | 15.4         | 0.0          | 42.1         | 0.0         | 0.0          | 14.2         | 48.7         | 0           | 28.4        |
| 117         | 0.71        | 13.7         | 0.0          | 6.1          | 0.0          | 24.9         | 0.0         | 0.0          | 2.6          | 60.8         | 0           | 12.4        |
| 118         | 0.92        | 29.1         | 0.0          | 5.4          | 0.0          | 28.7         | 1.0         | 11.6         | 0.0          | 0.0          | 3.97        | 2.1         |
| 119         | 0.68        | 17.0         | 0.0          | 4.8          | 7.9          | 0.2          | 0.0         | 10.2         | 0.0          | 0.0          | 0           | 15.7        |
| 123         | 0.80        | 5.0          | 0.0          | 0.0          | 0.0          | 18.9         | 40.0        | 0.0          | 80.0         | 80.0         | 0           | 0.0         |
| 127         | 0.99        | 0.0          | 0.0          | 11.6         | 28.6         | 28.2         | 0.0         | 32.3         | 0.0          | 0.0          | 0           | 18.6        |
| 128         | 0.77        | 36.5         | 0.0          | 15.4         | 0.0          | 6.0          | 0.0         | 0.0          | 14.2         | 48.7         | 0           | 28.4        |
| 130         | 0.65        | 32.7         | 0.0          | 7.5          | 0.0          | 35.0         | 4.0         | 0.0          | 46.0         | 26.0         | 0           | 26.4        |
| 131         | 0.83        | 45.7         | 6.4          | 9.5          | 20.7         | 24.7         | 47.6        | 41.7         | 0.0          | 0.0          | 0           | 0.0         |
| 132         | 0.67        | 23.9         | 7.0          | 2.4          | 0.0          | 35.6         | 0.0         | 0.0          | 0.0          | 33.3         | 13.33       | 0.0         |
| 134         | 0.58        | 32.8         | 4.5          | 10.5         | 24.5         | 12.2         | 14.5        | 16.7         | 38.9         | 0.0          | 0           | 0.0         |
| 135         | 0.62        | 11.0         | 19.2         | 14.1         | 0.0          | 0.0          | 22.7        | 30.3         | 38.9         | 0.0          | 4.21        | 11.7        |
| 136         | 0.90        | 0.0          | 32.6         | 5.6          | 27.8         | 0.0          | 15.5        | 14.5         | 0.0          | 77.7         | 0           | 0.0         |
| 137         | 0.67        | 0.9          | 28.6         | 13.5         | 8.9          | 27.1         | 26.6        | 33.3         | 33.3         | 0.0          | 0           | 0.0         |
| 138         | 0.93        | 0.0          | 13.1         | 8.7          | 7.2          | 0.0          | 0.0         | 44.8         | 50.7         | 0.0          | 5.6         | 19.3        |
| 139         | 0.69        | 19.3         | 34.3         | 19.9         | 0.0          | 0.0          | 36.7        | 23.7         | 44.0         | 64.1         | 0           | 27.4        |
| 140         | 0.96        | 7.6          | 34.3         | 20.5         | 0.0          | 0.0          | 36.0        | 26.4         | 81.7         | 0.0          | 1.58        | 16.7        |
| 141         | 0.67        | 0.9          | 28.6         | 13.5         | 8.9          | 13.9         | 26.6        | 33.3         | 0.0          | 0.0          | 0           | 0.0         |
| 142         | 0.88        | 21.2         | 11.8         | 11.2         | 22.9         | 39.2         | 22.0        | 25.1         | 58.7         | 0.0          | 0           | 0.0         |
| 144         | 0.52        | 0.0          | 16.8         | 6.6          | 14.6         | 6.7          | 0.0         | 3.0          | 0.0          | 31.8         | 9.03        | 0.0         |
| 145         | 0.83        | 12.4         | 3.8          | 13.7         | 15.0         | 0.0          | 0.0         | 20.7         | 53.3         | 5.5          | 0           | 38.6        |
| 146         | 0.58        | 13.4         | 19.2         | 9.4          | 29.5         | 0.0          | 0.0         | 11.9         | 23.7         | 0.0          | 0           | 0.0         |
| 147         | 0.80        | 0.0          | 0.0          | 10.9         | 5.3          | 24.0         | 0.0         | 27.3         | 33.6         | 66.7         | 0           | 14.8        |
| 148         | 0.80        | 29.1         | 30.4         | 14.2         | 41.8         | 8.6          | 17.0        | 21.9         | 0.0          | 0.0          | 0           | 0.0         |
| 149         | 0.39        | 12.1         | 0.8          | 6.1          | 0.0          | 0.0          | 0.0         | 13.3         | 33.5         | 22.9         | 2.51        | 13.6        |
| 150         | 0.89        | 22.1         | 51.8         | 30.9         | 46.3         | 0.0          | 0.0         | 1.1          | 16.4         | 36.1         | 0           | 54.8        |
| 151         | 0.39        | 19.8         | 5.3          | 10.4         | 0.0          | 6.6          | 5.3         | 5.3          | 5.3          | 0.0          | 1.93        | 10.5        |
| 152         | 0.69        | 0.0          | 35.1         | 21.3         | 47.7         | 36.4         | 24.5        | 29.4         | 9.4          | 0.0          | 0           | 25.8        |
| 153         | 0.38        | 19.6         | 1.2          | 8.8          | 0.0          | 8.3          | 0.0         | 1.9          | 18.8         | 30.1         | 0           | 8.7         |
| 154         | 0.88        | 0.0          | 39.1         | 27.9         | 55.1         | 0.0          | 9.7         | 38.2         | 0.0          | 0.0          | 6.95        | 48.9        |
| 155         | 0.43        | 21.1         | 12.7         | 14.4         | 0.0          | 0.0          | 18.3        | 0.0          | 18.8         | 36.6         | 0           | 24.0        |
| 156         | 0.67        | 0.0          | 34.2         | 20.7         | 46.4         | 21.3         | 9.0         | 18.9         | 38.3         | 0.0          | 0           | 31.8        |
| 158         | 0.49        | 0.0          | 15.4         | 4.2          | 19.4         | 0.1          | 0.0         | 13.7         | 22.8         | 0.0          | 0           | 0.0         |
| 159         | 0.84        | 18.9         | 0.0          | 7.2          | 0.0          | 15.8         | 12.0        | 0.0          | 4.8          | 0.0          | 5.38        | 9.7         |
| 160         | 0.88        | 11.8         | 0.0          | 0.0          | 6.6          | 41.0         | 0.0         | 0.0          | 4.5          | 12.0         | 7.66        | 6.9         |
| 161         | 0.68        | 0.0          | 23.2         | 9.6          | 30.0         | 16.6         | 1.0         | 23.2         | 34.3         | 0.0          | 0           | 1.9         |
| 163         | 0.90        | 16.3         | 42.0         | 26.9         | 0.0          | 1.1          | 48.3        | 0.0          | 0.0          | 89.8         | 0           | 53.0        |
| 164         | 0.59        | 0.0          | 20.3         | 8.4          | 26.2         | 25.6         | 1.0         | 10.6         | 30.0         | 0.0          | 2.96        | 1.7         |
| 165         | 0.68        | 12.5         | 5.7          | 10.5         | 0.0          | 9.4          | 17.3        | 0.7          | 0.0          | 66.1         | 0           | 29.8        |
| 168         | 0.48        | 0.0          | 26.9         | 12.1         | 11.0         | 18.1         | 0.0         | 0.0          | 23.8         | 0.0          | 0           | 14.9        |
| 169         | 0.47        | 0.0          | 28.1         | 14.4         | 0.0          | 0.0          | 0.0         | 5.0          | 5.0          | 46.7         | 0           | 19.3        |
| <b>Mean</b> | <b>0.73</b> | <b>16.52</b> | <b>15.70</b> | <b>13.55</b> | <b>13.26</b> | <b>12.99</b> | <b>9.88</b> | <b>11.23</b> | <b>25.95</b> | <b>24.49</b> | <b>1.28</b> | <b>17.7</b> |
